# Supplementary material
Source: Elsevier journal article supplement (https://rcastoragev2.blob.core.windows.net/efb63880d7dc973ea7311fb4e19db69d/mmc1.pdf)
Supplement: mmc1 [file mmc1.pdf]

## **Supplemental information**

### **T cell-derived interleukin-22 drives the expression of CD155 by cancer cells to suppress NK cell function and promote metastasis**

**Daria Briukhovetska, Javier Suarez-Gosalvez, Cornelia Voigt, Anamarija Markota, Anastasios D. Giannou, Maryam Schübel, Jakob Jobst, Tao Zhang, Janina Dörr, Florian Märkl, Lina Majed, Philipp Jie Müller, Peter May, Adrian Gottschlich, Nicholas Tokarew, Jöran Lücke, Arman Oner, Melanie Schwerdtfeger, David Andreu-Sanz, Ruth Grünmeier, Matthias Seifert, Stefanos Michaelides, Michael Hristov, Lars M. König, Bruno Loureiro Cadilha, Oleg Mikhaylov, Hans-Joachim Anders, Simon Rothenfusser, Richard A. Flavell, Daniela Cerezo-Wallis, Cristina Tejedo, María S. Soengas, Tobias Bald, Samuel Huber, Stefan Endres, and Sebastian Kobold**

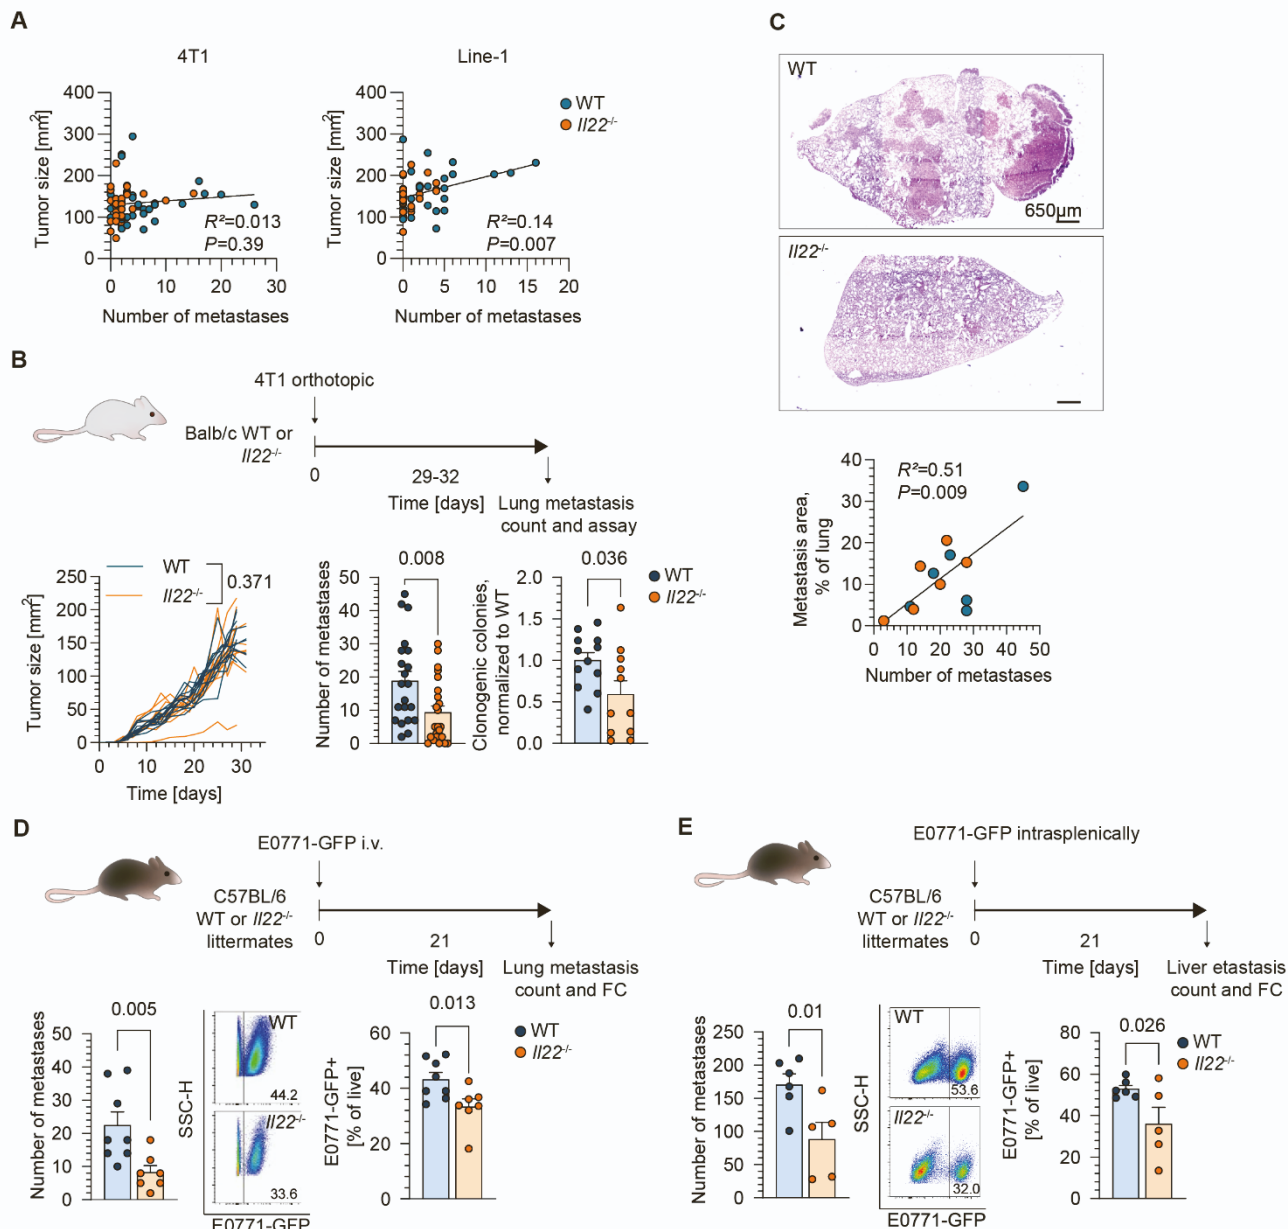

**Figure S1, related to Fig. 1 IL-22 deficiency reduces the number of lung and liver metastases in syngeneic mouse models of lung and breast carcinoma.** (A) Linear regression analysis of the correlation between the tumor size and the number of metastases from (Fig. 1). (B) Syngeneic 4T1 model of orthotopic mammary pad injection in WT and  $Il22^{-/-}$  animals. Subcutaneous tumor growth, macroscopic metastases in the lungs, and colonies in clonogenic metastasis assay (n=20 for tumor growth and the number of metastases, n = 12 and 10 for clonogenic assay, data of three and two experiments pooled). (C) Representative microphotographs of HE-stained lung section with visible metastases. Linear regression analysis of macrometastasis vs metastatic area as a percent of the total area (n = 6). (D) Intravenous mouse model of E0771-GFP lung metastasis in WT and  $Il22^{-/-}$  littermate mice. Numbers of metastases, representative flow cytometry plots, and frequency of E0771-GFP<sup>+</sup>. The numbers are the frequency of the parent gate (n = 8 and 6). (E) Intrasplenic mouse model of E0771-GFP liver metastasis in WT and  $Il22^{-/-}$  mice. Numbers of metastases in the liver, representative flow cytometry plots, and frequency of E0771-GFP<sup>+</sup> cells. The numbers are the frequency of the parent gate. (n = 6 and 5). Data presented as means  $\pm$  SEM, p-values < 0.05 were considered significant by the Mann-Whitney U test.

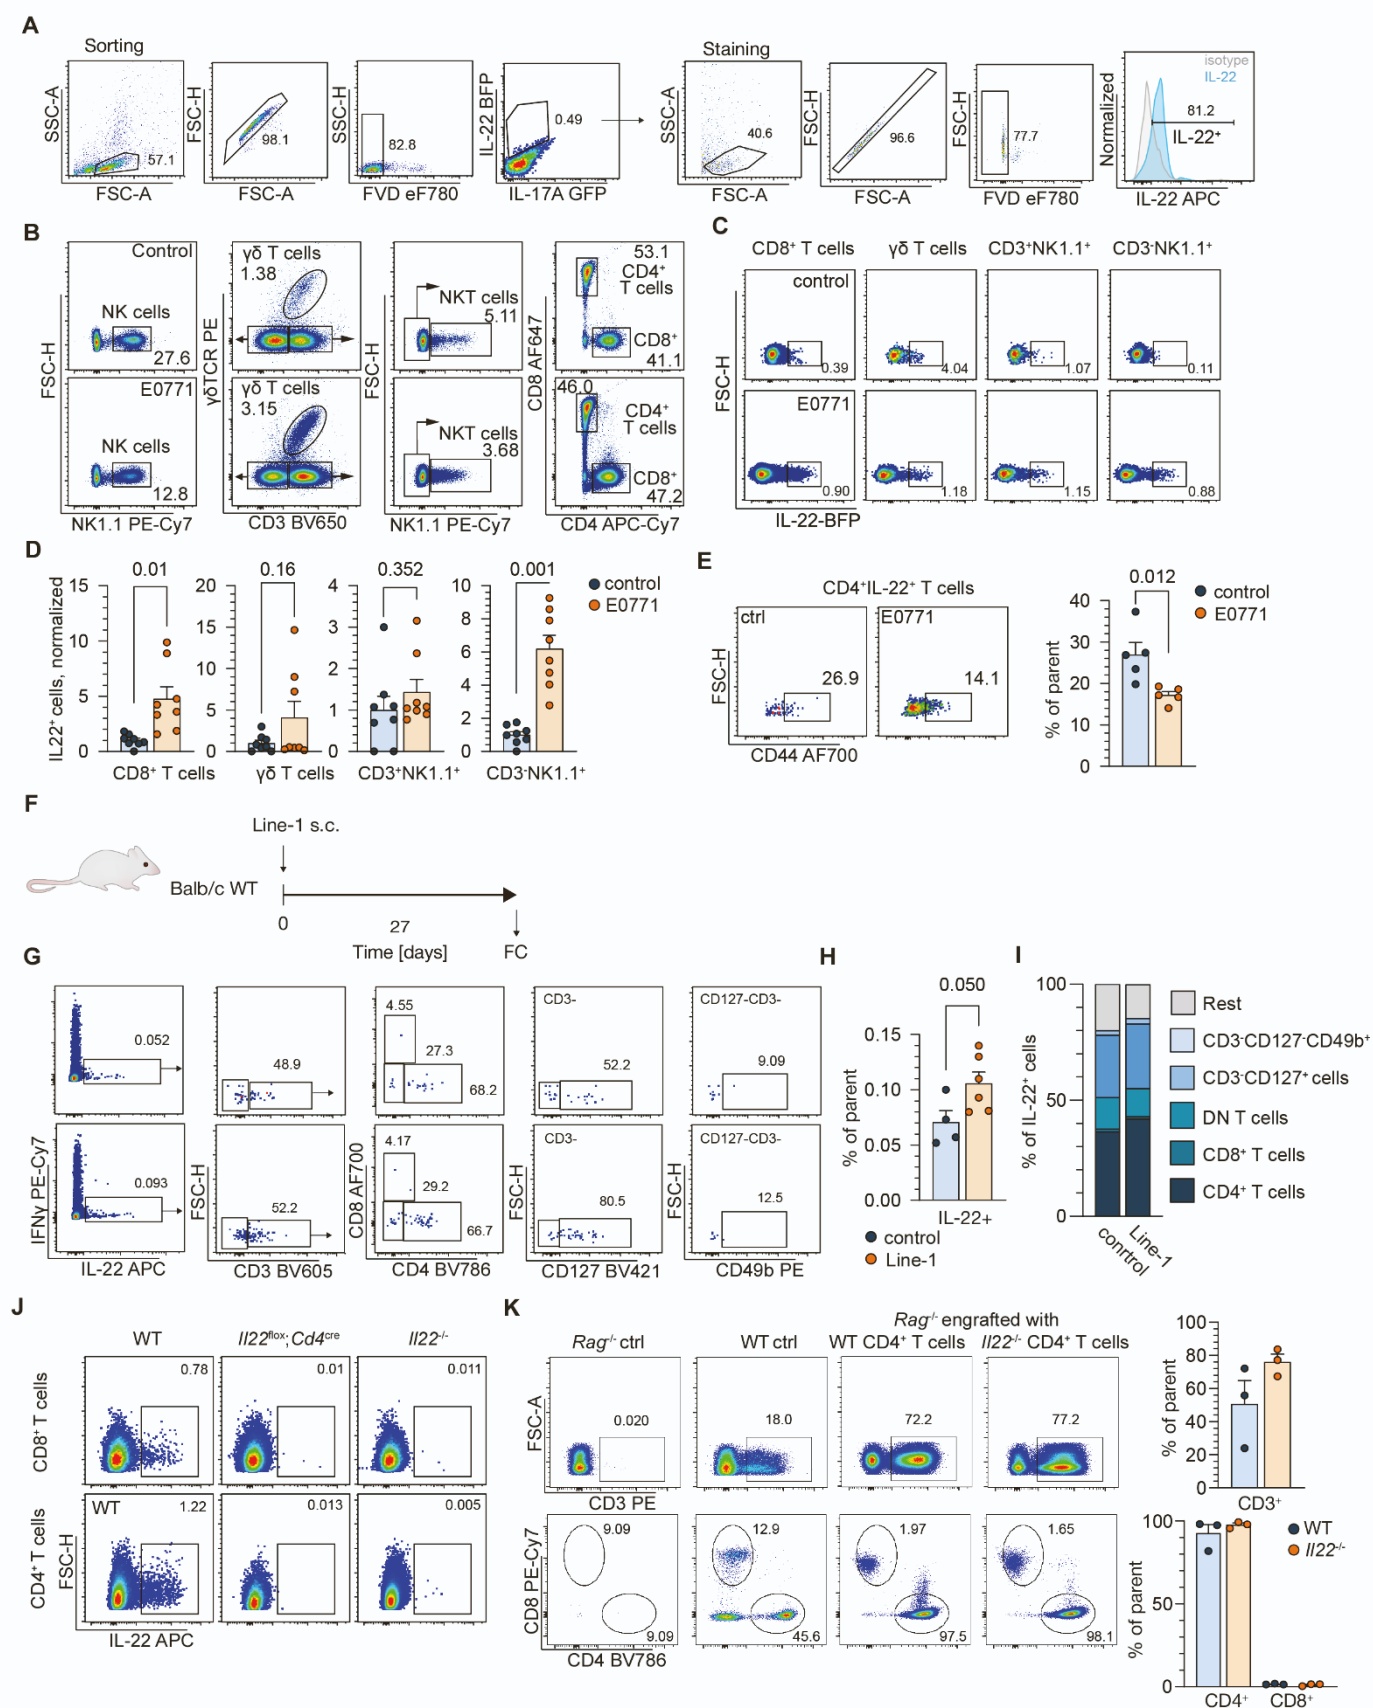

**Figure S2, related to Fig. 2** T cells are the primary source of IL-22 in the lung of mice bearing subcutaneous tumors.

(A) Intracellular staining of FACS-sorted BFP<sup>+</sup> cells from the lung of *Foxp3<sup>mRFP</sup> Il17a<sup>GFP</sup> Il22<sup>sgBFP</sup>* mice. (B) Gating strategy to identify CD4<sup>+</sup>, CD8<sup>+</sup> and double negative (DN) T cells,  $\gamma\delta$  T cells, CD3<sup>+</sup>NK1.1<sup>+</sup>, and CD3<sup>-</sup>NK1.1<sup>+</sup> cells in the lungs of reporter mice and (C) IL-22 production in identified populations. Numbers represent the frequency of the parent

gate. **(D)** Percentage of IL-22<sup>+</sup> cells normalized to control and reported per animal (n = 8). Data are presented as means ± SEM, and p-values <0.05 are considered significant as calculated by the Mann-Whitney U test. **(E)** CD44 expression by CD4<sup>+</sup>IL-22<sup>+</sup> T cells. **(F)** Subcutaneous model of Line-1 metastasis in WT and *Il22*<sup>-/-</sup> mice. **(G)** Gating strategy to identify CD4<sup>+</sup>, CD8<sup>+</sup> αβT cells, γδ T cells, CD3<sup>-</sup>CD127<sup>+</sup> ILCs, CD3<sup>-</sup>CD49b<sup>+</sup> NK cells in the lungs. Numbers represent the frequency of the parent gate. **(H)** Percentage of IL-22<sup>+</sup> cells (n = 4 and 6). **(I)** Breakdown of IL-22<sup>+</sup> cells by cell type as defined by the mean frequency of reported experiments. Data are presented as mean ± SEM, and a representative experiment of three is shown. P-values <0.05 are considered significant as calculated by the Mann-Whitney U test. **(J)** Intracellular IL-22 staining of Th17 polarized splenocytes from WT, *Il22*<sup>fllox</sup>*Cd4*<sup>cre</sup>, and *Il22*<sup>-/-</sup> mice. **(K)** Engraftment of adoptively transferred MACS sorted WT and *Il22*<sup>-/-</sup> CD4<sup>+</sup> T cells in the lungs of *Rag1*<sup>-/-</sup> mice 3 weeks post transfer. Representative dot plots, and frequency of total CD3<sup>+</sup>, CD4<sup>+</sup>, and CD8<sup>+</sup> cells are presented (n = 3).

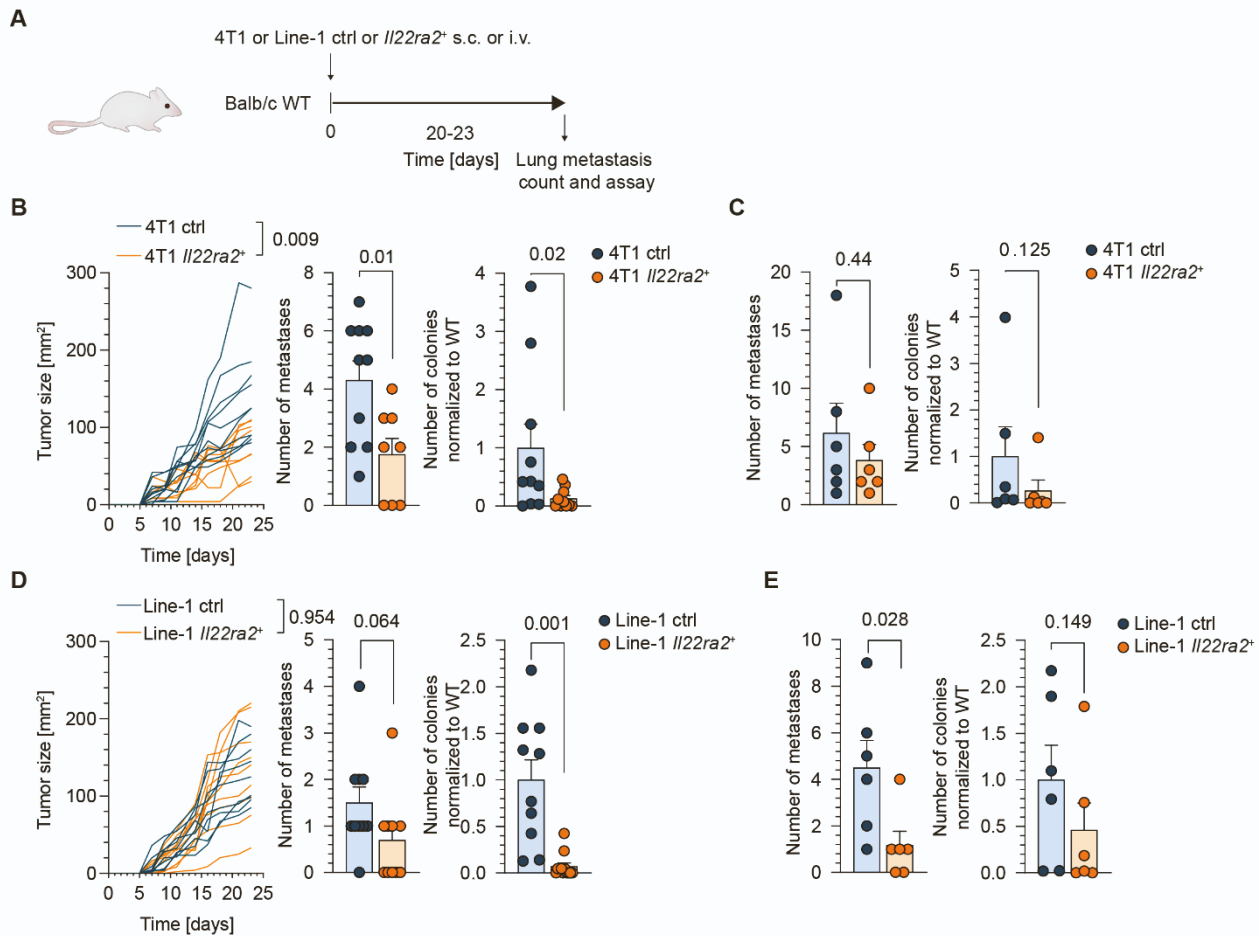

**Figure S3, related to Fig. 3 IL-22BP reduces the number of lung metastases but does not affect tumor growth in subcutaneous and intravenous models of lung and breast carcinoma.**

**(A)** Subcutaneous and intravenous mouse models of 4T1 and Line-1 *Il22ra2*<sup>+</sup> breast cancer metastasis. **(B)** Tumor size, the number of macroscopic metastases, and colonies in clonogenic metastasis assay in lungs from wild-type BALB/c mice injected s.c. with 4T1 control or 4T1 *Il22ra2*<sup>+</sup> cells as reported per animal ( $n = 10$ ). Data from two independent experiments were pooled. **(C)** Numbers of macroscopic metastases and colonies in clonogenic metastasis assay injected i.v. with 4T1 control or *Il22ra2*<sup>+</sup> cells as reported per animal ( $n = 6$ ). Data is from one experiment. **(D)** Tumor size, number of macroscopic metastases, and colonies in clonogenic metastasis assay in the lungs of mice injected s.c. with Line-1 control or *Il22ra2*<sup>+</sup> cells as reported per animal ( $n = 10$ ). Data from two independent experiments were pooled. **(E)** Numbers of macroscopic metastases and colonies in clonogenic metastasis assay in the lungs of mice injected i.v. with Line-1 control or *Il22ra2*<sup>+</sup> cells as reported per animal ( $n = 6$ ). Data are from one experiment and are represented as means  $\pm$  SEM,  $p$ -values  $< 0.05$  were considered significant by the mixed-effect two-way analysis for tumor growth and by the Mann-Whitney test for the number of metastases and colonies.

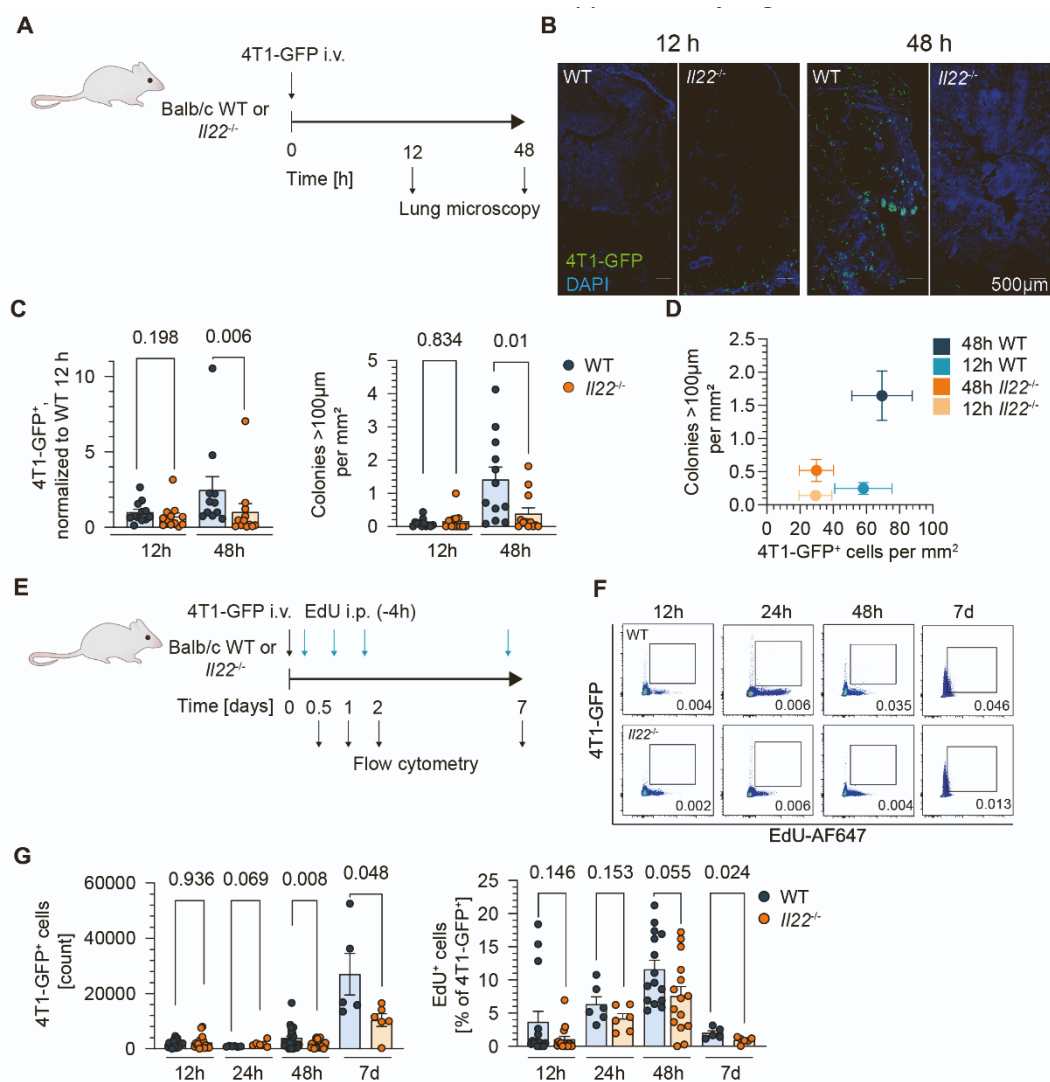

**Figure S4, related to figure 3: IL-22 does not affect the seeding but the outgrowth of tumor cells during the early stages of engraftment.**

(A) 4T1-GFP breast cancer model of seeding and outgrowth where WT and *Il22*<sup>-/-</sup> mice were sacrificed 12 or 48 hours after i.v. cancer cell injection. (B) Representative confocal images of the lungs. The GFP signal is depicted in green, and DAPI is in blue. (C) Numbers of individual 4T1-GFP cells and colonies larger than 100 μm per mm<sup>2</sup>, normalized to the mean of WT control as reported for each mouse (n = 12). Data from three independent experiments were pooled. Data are presented as means ± SEM, and p-values < 0.05 are considered significant by the Mann-Whitney U test. (D) The correlation between the number of individual 4T1-GFP cells and the colonies larger than 100 μm in each condition is depicted by the mean of all samples ± SD. (E) Intravenous mouse model of 4T1-GFP breast cancer cell proliferation. Mice were co-injected with EdU four hours before preparation and sacrificed at 12-, 24-, 48-hour, and 7-day time points. (F) Representative contour plots of the lung cells. Numbers represent the frequency of the parent gate. (G) Total numbers of 4T1-GFP<sup>+</sup> cells in the lungs as reported per mouse (n = 19 and 25). Data from five independent experiments were pooled. Percentage of proliferating E0771-GFP<sup>+</sup> cells as reported per mouse (n = 15). Data from three independent experiments are pooled and are presented as means ± SEM, p-values < 0.05 are considered significant as calculated by the Mann-Whitney U test.

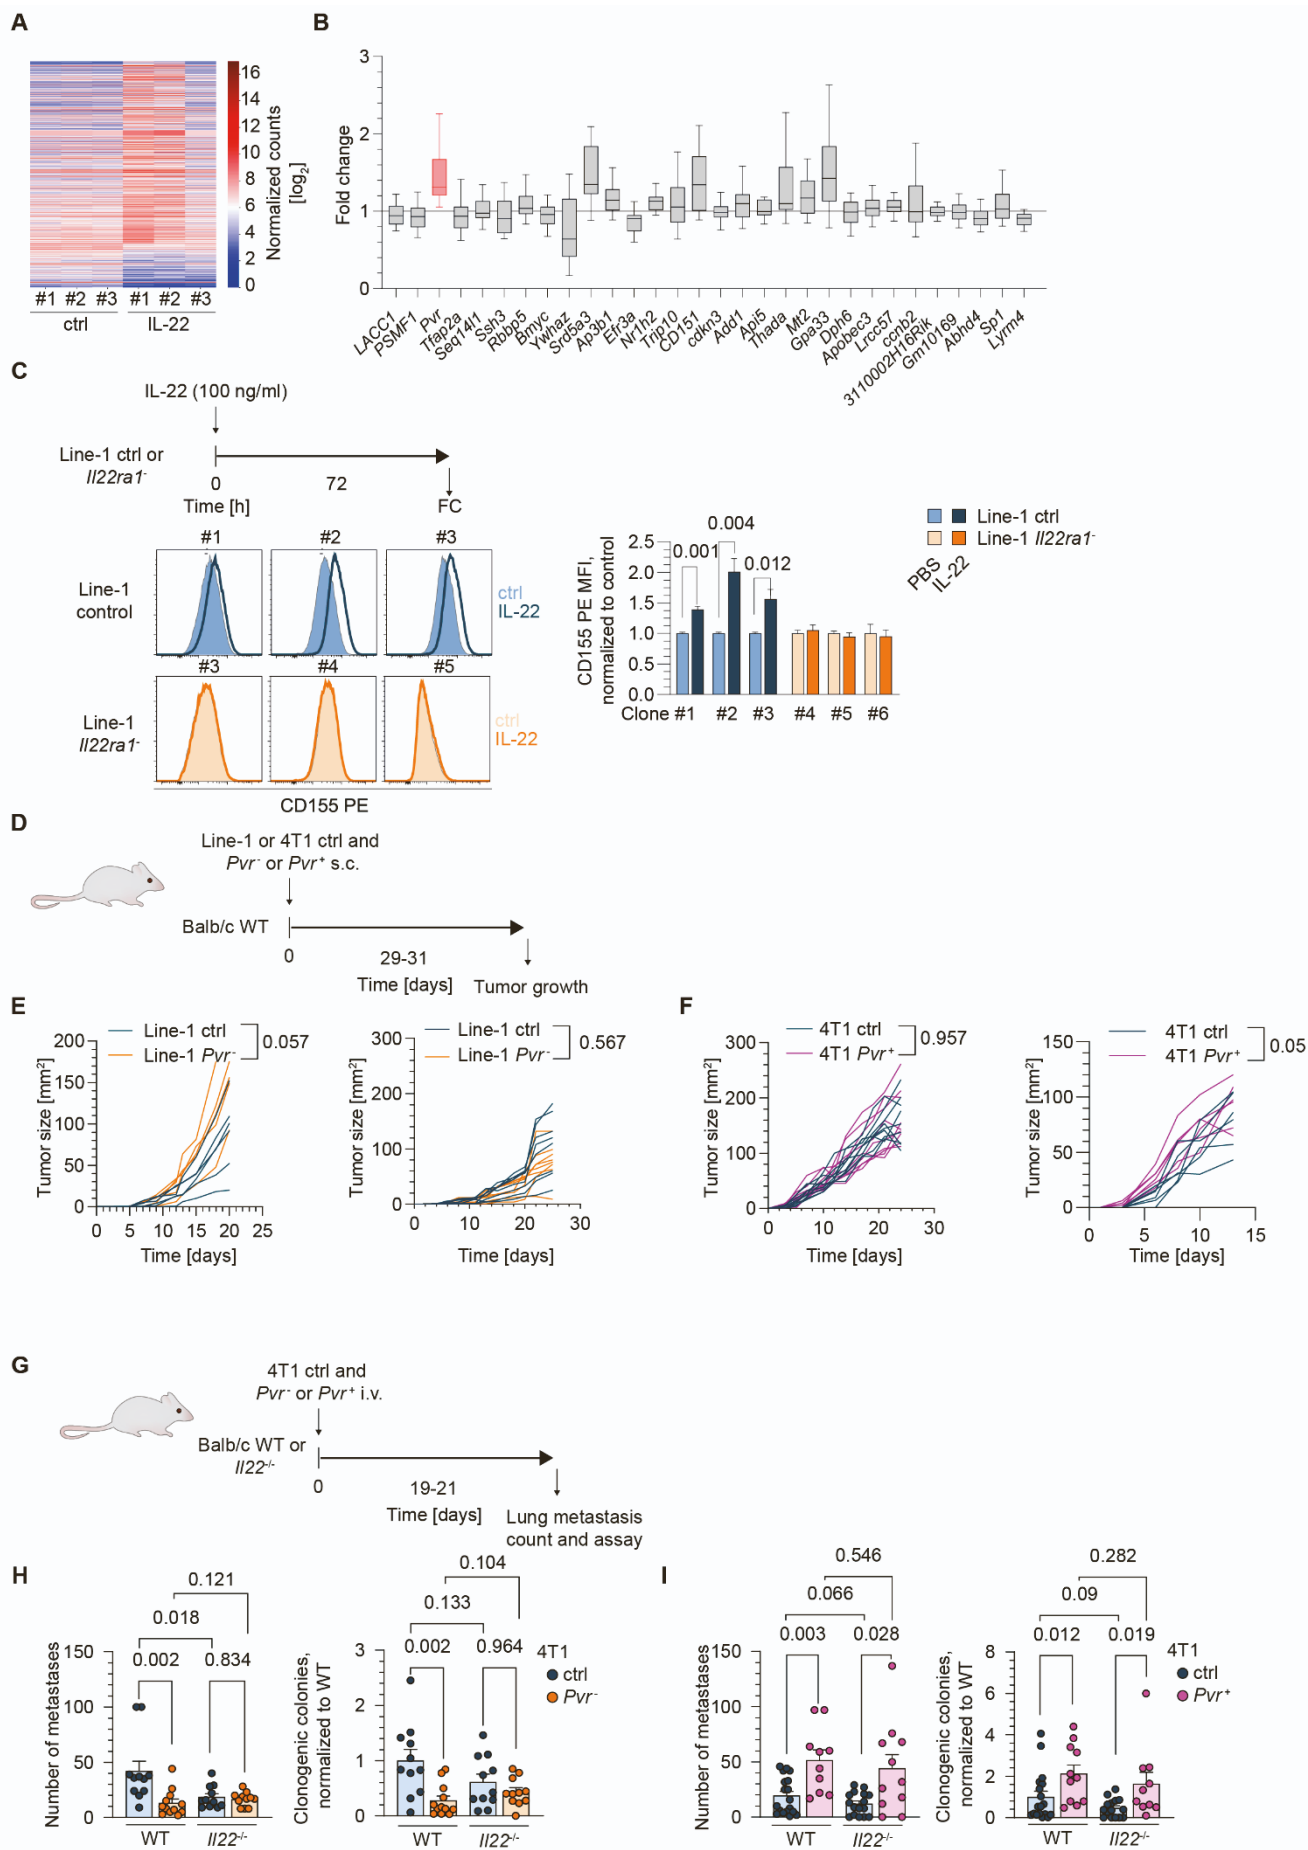

**Figure S5, related to Figure 5:** (A) The heat plot reports the fold change of three individual control and IL-22 treated replicates in RNAseq. (B) Expression of the chosen differentially regulated genes as determined by RT-qPCR and presented as fold change over unstimulated control (n = 3). Data are presented as minimum, maximum, median, and quartiles. (C) CD155 expression in Line-1 *Il22ra1*<sup>-</sup> cells after stimulation with rmIL-22 (100 ng/ml) for 72 hours *in vitro*. Representative histograms of CD155 expression at 24, 48, and 72 hours and normalized MFI in three control and test clones. (D) Subcutaneous tumor growth of (E) Line-1 *Pvr*<sup>-</sup> (n = 6) and *Pvr*<sup>+</sup> (n = 8); 4T1 *Pvr*<sup>-</sup> (n = 9) and *Pvr*<sup>+</sup> (n = 6) cells in WT mice. (G) Intravenous mouse models of 4T1 *Pvr*<sup>-</sup> (H) and *Pvr*<sup>+</sup> (I) metastasis in WT or *Il22*<sup>-/-</sup> mice. Numbers of metastases and colonies in clonogenic metastasis assay as reported per animal (n = 14 and 17). Data from three independent experiments pooled, presented as means ± SEM, p-values < 0.05 were considered significant by the Mann-Whitney U test or mixed model analysis for tumor growth.



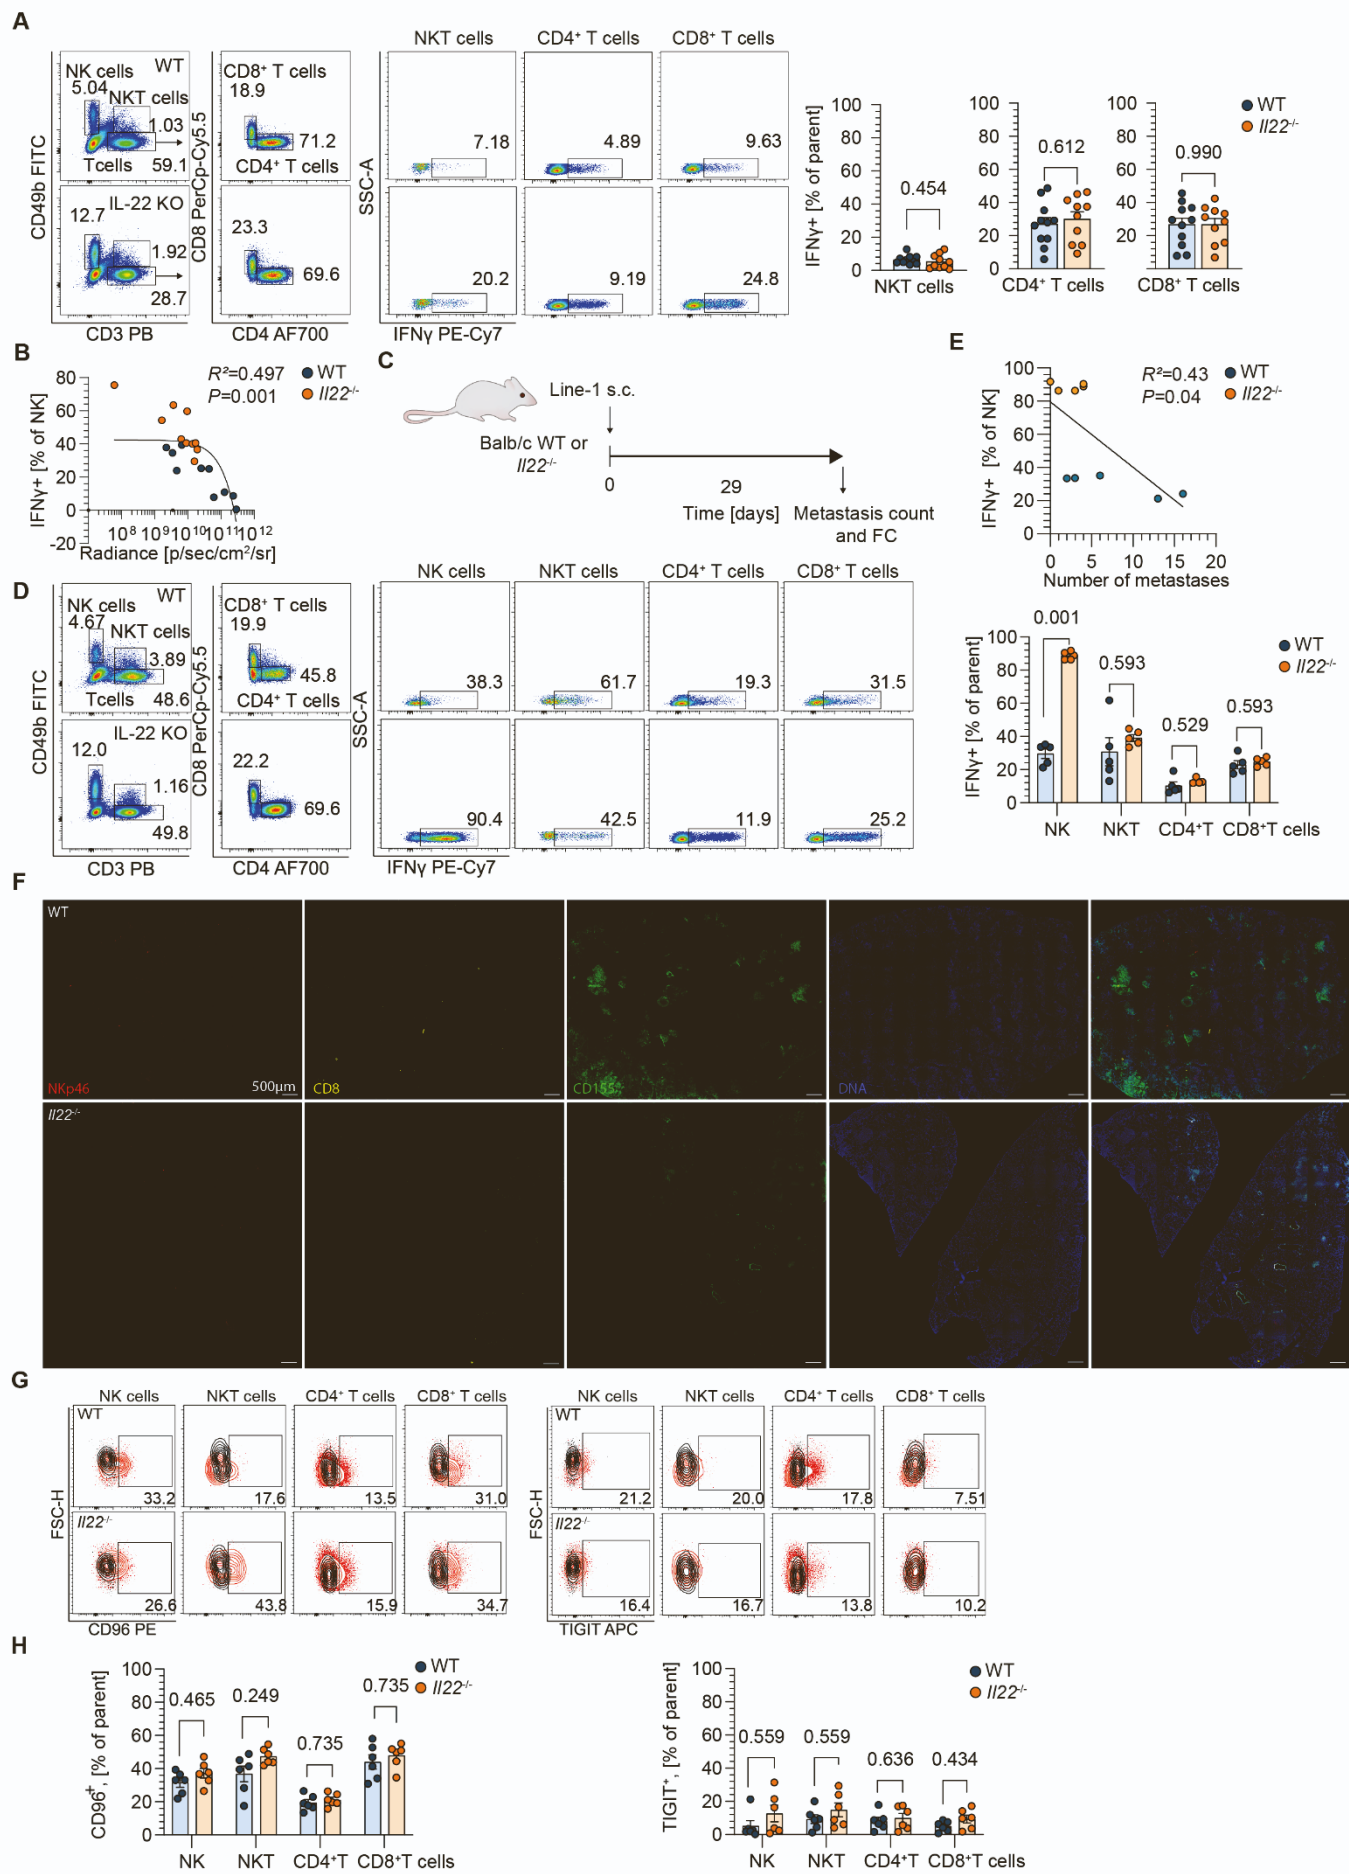

**Figure S6, related to Figure 5: CD226, but not CD96 or TIGIT, is upregulated on NK cells of *Il22*<sup>-/-</sup> mice. (A)**

Representative dot plots and gating strategy of IFN $\gamma$  producing CD8<sup>+</sup> T cells, CD4<sup>+</sup> T cells, and NKT cells in the lungs from (Fig. 5). Numbers represent the frequency of the parent gate. **(B)** Linear regression analysis of the correlation between the lung radiance and fraction of IFN $\gamma$ <sup>+</sup> NK cells in the lung from (Fig. 5). **(C)** Subcutaneous mouse model of Line-1 lung metastasis. **(D)** Gating strategy and **(E)** frequency of IFN $\gamma$  production by CD8<sup>+</sup> T cells, CD4<sup>+</sup> T cells, NKT cells, and NK cells in the lung. Linear regression analysis of the correlation between the number of lung metastases and the IFN $\gamma$ <sup>+</sup> NK cells (n =5). **(F)** Entire fluorescent microscopy image overviews of the lungs of 4T1-injected WT and *Il22*<sup>-/-</sup> mice that were used for chip cytometry segmentation in Figure 5F. Nkp46 FITC signal is depicted in red, CD8 AF555 in yellow, CD155 PE in green, and Hoechst DNA staining in blue. **(G)** Representative dot plots of CD96 and TIGIT staining on CD8<sup>+</sup> T cells, CD4<sup>+</sup> T cells, NKT cells, NK cells, and **(H)** frequency of CD96<sup>+</sup> and TIGIT<sup>+</sup> cells in the lungs. Numbers represent the frequency of the parent gate (n = 6, one representative experiment of 2). Isotype control is depicted in black. Data presented as means  $\pm$  SEM, p-values < 0.05 were considered significant by the Mann-Whitney U test or multiple unpaired t-tests with Holm-Sidak correction.

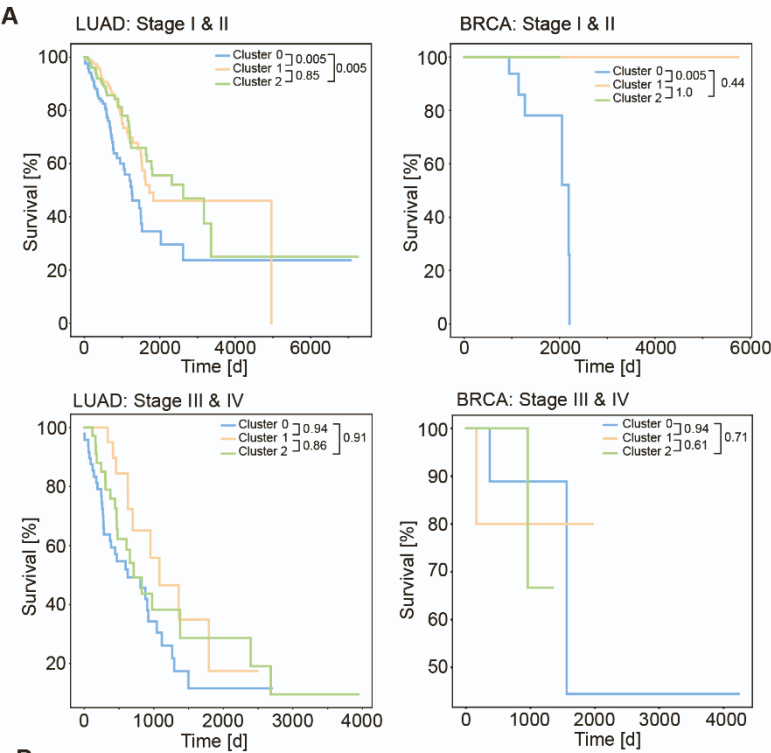

**B**

|         | coef  | exp (coef) | se (coef) | coef upper 95% | coef lower 95% | exp(coef) upper 95% | exp(coef) lower 95% | z     | p      | -log2(p) |
|---------|-------|------------|-----------|----------------|----------------|---------------------|---------------------|-------|--------|----------|
| CD226   | -0.24 | 0.79       | 0.13      | 0.01           | -0.49          | 1.01                | 0.61                | -1.88 | 0.06   | 4.05     |
| CD96    | 0.09  | 1.09       | 0.14      | 0.37           | -0.19          | 1.45                | 0.83                | 0.64  | 0.52   | 0.93     |
| TIGIT   | -0.02 | 0.98       | 0.15      | 0.27           | -0.30          | 1.31                | 0.74                | -0.13 | 0.90   | 0.15     |
| IL22RA1 | 0.19  | 1.21       | 0.08      | 0.34           | 0.04           | 1.41                | 1.04                | 2.5   | 0.01   | 6.34     |
| IL22RA2 | -0.01 | 0.99       | 0.09      | 0.16           | -0.19          | 1.17                | 0.83                | -0.17 | 0.87   | 0.21     |
| IL10RB  | 0.09  | 1.09       | 0.08      | 0.24           | -0.06          | 1.28                | 0.94                | 1.14  | 0.25   | 1.97     |
| PVR     | 0.25  | 1.28       | 0.07      | 0.39           | 0.11           | 1.48                | 1.11                | 3.39  | <0.005 | 10.50    |

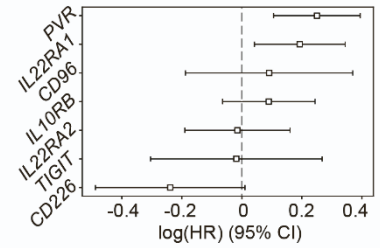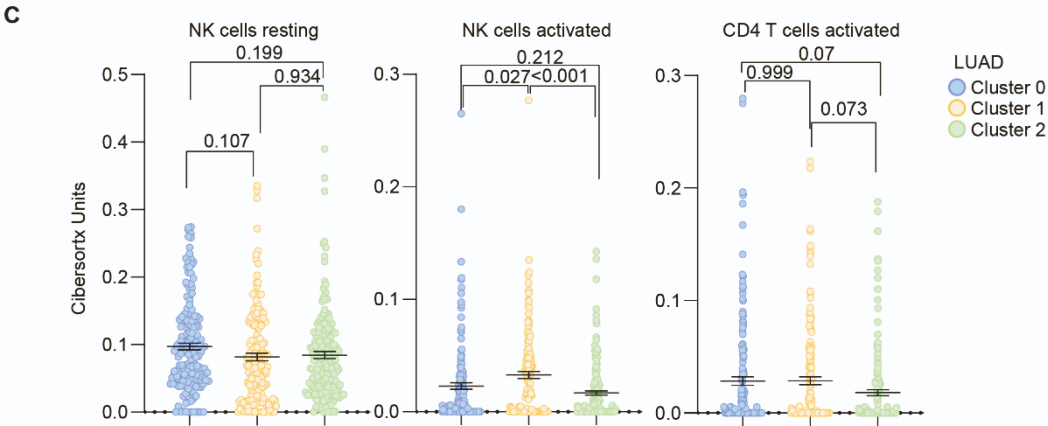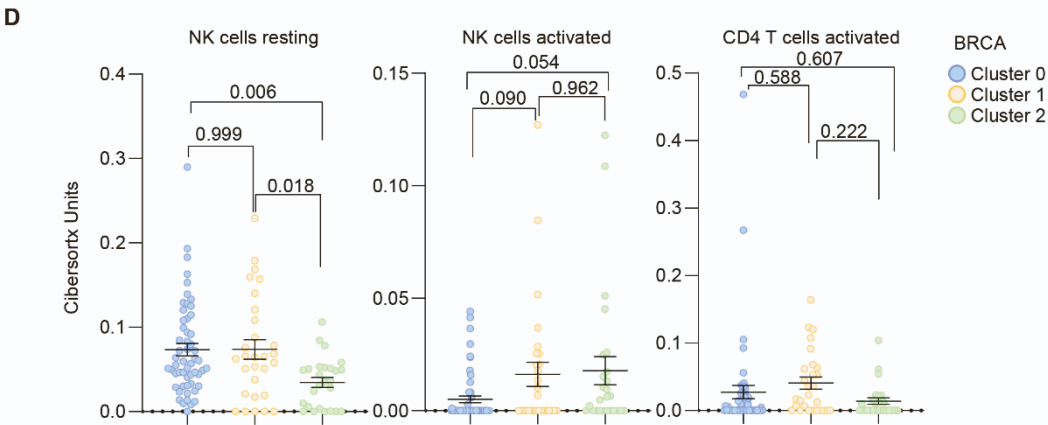

**Figure S7, related to Figure 7: Regression and deconvolution analysis of TCGA datasets** (A) Stage-specific survival of patients from LUAD and BRCA cohorts from Fig. 7. Log-rank (Mantel-Cox) test was used to compare curves. (B) Tabular results of Cox's proportional hazards model, fit on TCGA LUAD cohort and plot of the log (Hazard Ratio) of regression. (C) Results of CIBERSORTx deconvolution on LUAD samples for resting and activated NK cells and activated CD4<sup>+</sup> memory T cells in absolute units, showing different immune cell infiltrates for the IL-22 PVR Clusters. (D) CIBERSORTx results in BRCA samples for the previously mentioned immune-cell subtypes. P-values <0.05 were considered significant by Tukey's multiple comparisons test (for CIBERSORTx results) or Cox's proportional hazards models. Lines and whiskers indicate mean  $\pm$  SEM for CIBERSORTx results, and squares and whiskers indicate  $\log_2(\text{HR})$  and 95% confidence interval for Cox's proportional hazards model.

**Table S1, related to STAR methods: Oligonucleotides used in this study.**

| Oligo Name           | Purpose                                | Source                     | Sequence                                | Probe (Universal Probe library from Sigma) | Catalog number |
|----------------------|----------------------------------------|----------------------------|-----------------------------------------|--------------------------------------------|----------------|
| oIMR1084 Fw          | Genotyping CMV-cre mice                | Jackson Laboratory         | GCGGTCTGGCAGTAAAACTATC                  | N/A                                        | N/A            |
| oIMR1085 Rw          | Genotyping CMV-cre mice                | Jackson Laboratory         | GTGAAACAGCATTGCTGTCACTT                 | N/A                                        | N/A            |
| CD4-cre Fw           | Genotyping CD4-cre mice                | IMI, Munich                | CCCAACCAACAAGAGCTC                      | N/A                                        | N/A            |
| CD4-cre Rw           | Genotyping CD4-cre mice                | IMI, Munich                | CCCAGAAATGCCAGATTACG                    | N/A                                        | N/A            |
| DNA460-40 Fw         | Genotyping 12955-IL22TM1.1L EX/ Mmuccl | Lexicon genetics (UNQ3099) | CTCAGACCTCTACAGACAATCATC                | N/A                                        | N/A            |
| DNA460-41 Rw         | Genotyping 12955-IL22TM1.1L EX/ Mmuccl | Lexicon genetics (UNQ3099) | GATACAGGTGCAGCTAAGCGAG                  | N/A                                        | N/A            |
| sgRNA <i>Il22ra1</i> | CRISPR-Cas9 gene edition               | CHOPCHOP v.3               | CTACTGACCATCCTGACGGT                    | N/A                                        | N/A            |
| sgRNA <i>Pvr</i>     | CRISPR-Cas9 gene edition               | CHOPCHOP v.3               | GCTTCTAATCTCCACCGTAG                    | N/A                                        | N/A            |
| Il22ra2 Fw           | PCR                                    | ProbeFinder 2.53           | ACAACAGCATCTACTTTGTGCAG                 | N/A                                        | N/A            |
| Il22ra2 Rw           | PCR                                    | ProbeFinder 2.53           | CCCCCAGCAGTCAACTTTAT                    | N/A                                        | N/A            |
| I22ra2 clone Fw      | Cloning                                | This paper                 | ATTACTCGAGGCCACCATGATGCCTAAG            | N/A                                        | N/A            |
| I22ra2 clone Rw      | Cloning                                | This paper                 | TAATGAATTCTCATGGAATGTGCACACATCTCTCC     | N/A                                        | N/A            |
| CD155-Frag1.FOR      | Cloning                                | This paper                 | TACAGGCGGCCGCGCCACCATGGCTCAACTCGCCC     | N/A                                        | N/A            |
| CD155-Frag2.FOR      | Cloning                                | This paper                 | CAGCACAAGGGTGAAACAGACTTTGAATTTTGACCTTCT | N/A                                        | N/A            |
| CD155-Frag3.FOR      | Cloning                                | This paper                 | CCAGGCCCCGATGCCAGAGCCAGCG               | N/A                                        | N/A            |
| CD155-Frag1.REV      | Cloning                                | This paper                 | TCTGTTTCACCCTTGTGCTGTTTGCTC             | N/A                                        | N/A            |
| CD155-Frag2.REV      | Cloning                                | This paper                 | GGCATCGGGCCTGGGTTGG                     | N/A                                        | N/A            |
| CD155-Frag3.REV      | Cloning                                | This paper                 | TGCTCGAATTCTTACTTGTACAGCTCGTCCATG       | N/A                                        | N/A            |

|                      |         |                  |                                |      |                 |
|----------------------|---------|------------------|--------------------------------|------|-----------------|
| 3110002H1<br>6Rik Fw | RT-PCR  | ProbeFinder 2.53 | CATTATCAGTGCAAGCCAAGG          | #41  | Cat# 4688007001 |
| 3110002H1<br>6Rik Rw | RT-PCR  | ProbeFinder 2.53 | CCTTTATCTGGCAAGAGATTCAC        | #41  | Cat# 4688007001 |
| Add1 Fw              | RT-PCR  | ProbeFinder 2.53 | GGGTGATGACGCTTCTGAG            | #38  | Cat# 4687957001 |
| Add1 Rw              | RT-PCR  | ProbeFinder 2.53 | TGTCCATCCTCTTTAGTCCACTT        | #38  | Cat# 4687957001 |
| Ap3b1 Fw             | RT-PCR  | ProbeFinder 2.53 | GAAACACCAAGCCGTTGC             | #15  | Cat# 4685130001 |
| Ap3b1 Rw             | RT-PCR  | ProbeFinder 2.53 | AGCTGAGCGACAGCCATAAC           | #15  | Cat# 4685130001 |
| Api5 Fw              | RT-PCR  | ProbeFinder 2.53 | CCTCAGCACCTGACCAC              | #97  | Cat# 4692136001 |
| Api5 Rw              | RT-PCR  | ProbeFinder 2.53 | AACTCATCTCTGCCAACAACTTTA       | #97  | Cat# 4692136001 |
| Apobec3<br>Fw        | RT-PCR  | ProbeFinder 2.53 | CTGCTTACAAATTTTAGATACCAG<br>GA | #11  | Cat# 4685105001 |
| Apobec3<br>Rw        | RT-PCR  | ProbeFinder 2.53 | ACAGATATTTGACAGAGTGGATG<br>AA  | #11  | Cat# 4685105001 |
| Bmyc Fw              | RT-PCR  | ProbeFinder 2.53 | CCAAGCTGGTCTCCAAGC             | #64  | Cat# 4688627001 |
| Bmyc Rw              | RT-PCR  | ProbeFinder 2.53 | CGTAGCAGGCTCCACGTC             | #64  | Cat# 4688627001 |
| ccnb2 Fw             | RT-PCR  | ProbeFinder 2.53 | CAACCGTACCAAGTTCATCG           | #84  | Cat# 4689062001 |
| ccnb2 Rw             | RT-PCR  | ProbeFinder 2.53 | GAGGGATCGTGCTGATCTTC           | #84  | Cat# 4689062001 |
| CD151 Fw             | RT-PCR  | ProbeFinder 2.53 | CGCTCACTGGTGTTCTAGTC           | #16  | Cat# 4685148001 |
| CD151 Rw             | RT-PCR  | ProbeFinder 2.53 | CTCAGAGCCACCAGATCTCA           | #16  | Cat# 4685148001 |
| cdkn3 Fw             | RT-PCR  | ProbeFinder 2.53 | GATGAAGAACAGACTCCAATTCA<br>A   | #48  | Cat# 4688074001 |
| cdkn3 Rw             | RT-PCR  | ProbeFinder 2.53 | AACCTGGAAGAGCACATAAACC         | #48  | Cat# 4688074001 |
| Dph6 Fw              | RT-PCR  | ProbeFinder 2.53 | CAACGTGGACGAGTAGAAAATG         | #19  | Cat# 4686918001 |
| Dph6 Rw              | RT-PCR  | ProbeFinder 2.53 | TCTCTCGGAGCAAATCTTCC           | #19  | Cat# 4686918001 |
| Efr3a Fw             | RT-PCR  | ProbeFinder 2.53 | GCTTCATGATAGACTTGCTCAAAT<br>A  | #52  | Cat# 4688589001 |
| Efr3a Rw             | RT-PCR  | ProbeFinder 2.53 | GTAACGGTCAATGTTCCAGATG         | #52  | Cat# 4688589001 |
| Gm10169<br>Fw        | RT-PCR: | ProbeFinder 2.53 | GCCAGAGGGGTTTCTGTCT            | #3   | Cat# 4684982001 |
| Gm10169<br>Rw        | RT-PCR  | ProbeFinder 2.53 | TTCGTGCCGCTAAAAGTCAT           | #3   | Cat# 4684982001 |
| Gpa33 Fw             | RT-PCR  | ProbeFinder 2.53 | GTCCGCCTCTTGGTCCTT             | #89  | Cat# 4689135001 |
| Gpa33 Rw             | RT-PCR  | ProbeFinder 2.53 | GTTGTTCCCGATCACCATCT           | #89  | Cat# 4689135001 |
| LACC1 Fw             | RT-PCR  | ProbeFinder 2.53 | TTGGCTTCATATCCCTTAGAGAA        | #19  | Cat# 4686918001 |
| LACC1 Rw             | RT-PCR  | ProbeFinder 2.53 | GGAAGGATGCAGGAAACATC           | #19  | Cat# 4686918001 |
| Lrcc57 Fw            | RT-PCR  | ProbeFinder 2.53 | AAACTTCGAGAACTAGAGGGTTA<br>TGA | #76  | Cat# 4688988001 |
| Lrcc57 Rw            | RT-PCR  | ProbeFinder 2.53 | GATCCTGGAGAATATCATGCAA         | #76  | Cat# 4688988001 |
| Lym4 Fw              | RT-PCR  | ProbeFinder 2.53 | GCATTTTCAGCGCCTACAATTA         | #2   | Cat# 4685091001 |
| Lym4 Rw              | RT-PCR  | ProbeFinder 2.53 | TCACCAGGGCTTGAATTTCT           | #2   | Cat# 4685091001 |
| Mt2 Fw               | RT-PCR  | ProbeFinder 2.53 | CATGGACCCCAACTGCTC             | #4   | Cat# 4685008001 |
| Mt2 Rw               | RT-PCR  | ProbeFinder 2.53 | AGCAGGAGCAGCAGCTTT             | #4   | Cat# 4685008001 |
| Nr1h2 Fw             | RT-PCR  | ProbeFinder 2.53 | AGCTCTGCCTACATCGTGGT           | #106 | Cat# 4692241001 |
| Nr1h2 Rw             | RT-PCR  | ProbeFinder 2.53 | AAGCCTTGCTCCGCACA              | #106 | Cat# 4692241001 |
| PSMF1 Fw             | RT-PCR  | ProbeFinder 2.53 | CTGTGGAGAACGGCATGAT            | #62  | Cat# 4688937001 |
| PSMF1 Rw             | RT-PCR  | ProbeFinder 2.53 | CATCTAAGTTCAGGGTCAAGTCT<br>G   | #62  | Cat# 4688937001 |
| PVR Fw               | RT-PCR  | ProbeFinder 2.53 | TGACCCTTTCCCAACCCTAT           | #106 | Cat# 4692241001 |
| PVR Rw               | RT-PCR  | ProbeFinder 2.53 | GAGGCCAACATACCAGTTGC           | #106 | Cat# 4692241001 |
| Rbbp5 Fw             | RT-PCR  | ProbeFinder 2.53 | GTAAAGTGAGGCGGAAGCTC           | #18  | Cat# 4686900001 |
| Rbbp5 Rw             | RT-PCR  | ProbeFinder 2.53 | TTCACAGCAGTTCTGAGATGG          | #18  | Cat# 4686900001 |
| Sec14l1 Fw           | RT-PCR  | ProbeFinder 2.53 | CGGGTGATAAACATCCCTTTG          | #46  | Cat# 4688058001 |
| Sec14l1 Rw           | RT-PCR  | ProbeFinder 2.53 | GGACATGTAGGAAACCTCCTCTC        | #46  | Cat# 4688058001 |
| Sp1 Fw               | RT-PCR  | ProbeFinder 2.53 | GCCCCTATTGCAAAGACAGT           | #103 | Cat# 4692209001 |

|           |        |                  |                              |      |                 |
|-----------|--------|------------------|------------------------------|------|-----------------|
| Sp1 Rw    | RT-PCR | ProbeFinder 2.53 | GCATCCTTGGATGTGACAAA         | #103 | Cat# 4692209001 |
| Srd5a3 Fw | RT-PCR | ProbeFinder 2.53 | TTCGATGTCCCCAAGAGGTA         | #106 | Cat# 4692241001 |
| Srd5a3 Rw | RT-PCR | ProbeFinder 2.53 | TCCCAGGAACAACGACTGA          | #106 | Cat# 4692241001 |
| Ssh3 Fw   | RT-PCR | ProbeFinder 2.53 | TCATGGTGGAGCTGCTGA           | #26  | Cat# 4687574001 |
| Ssh3 Rw   | RT-PCR | ProbeFinder 2.53 | ACCAGCAGGTAGCGAAGTCT         | #26  | Cat# 4687574001 |
| Tfap2a Fw | RT-PCR | ProbeFinder 2.53 | CAAGTACGAAGACTGCGAGGA        | #104 | Cat# 4692217001 |
| Tfap2a Rw | RT-PCR | ProbeFinder 2.53 | GCTGGTGTAGGGAGATTGACC        | #104 | Cat# 4692217001 |
| Thada Fw  | RT-PCR | ProbeFinder 2.53 | TCAGGCATCTACTGATACTGGAA<br>C | #82  | Cat# 4689151001 |
| Thada Rw  | RT-PCR | ProbeFinder 2.53 | GAGACACGCCATCAAAGCTC         | #82  | Cat# 4689151001 |
| Trip10 Fw | RT-PCR | ProbeFinder 2.53 | TTTCGGGAAAAAGAACAAGC         | #79  | Cat# 4689011001 |
| Trip10 Rw | RT-PCR | ProbeFinder 2.53 | GACAGTGTGGAGGGTAGGTGA        | #79  | Cat# 4689011001 |
| Ywhaz Fw  | RT-PCR | ProbeFinder 2.53 | TAAAAGGTCTAAGGCCGCTTC        | #71  | Cat# 4688945001 |
| Ywhaz Rw  | RT-PCR | ProbeFinder 2.53 | CACCACACGCACGATGAC           | #71  | Cat# 4688945001 |
